# Supplementary material for: Past, present and future therapeutic approaches in nodal peripheral T-cell lymphomas
Source: PubMed Central journal article supplement — Haematologica. 2023 Dec 1;108(12):3211–26. doi: 10.3324/haematol.2021.280275 (PMC10690928; doi:10.3324/haematol.2021.280275), 2023-12-01
Supplement: 2021_280275_NGU_SUPPL.pdf [file 2021_280275_NGU_SUPPL.pdf]

# Past, present and future therapeutic approaches in nodal peripheral T-cell lymphomas

Henry S. Ngu<sup>°</sup> and Kerry J. Savage

Center for Lymphoid Cancer, Division of Medical Oncology BC Cancer and the University of British Columbia, British Columbia, Vancouver, Canada

*<sup>°</sup>Current address: Department of Hematology, Auckland City Hospital, Auckland, New Zealand*

**Correspondence:** K.J. Savage  
[ksavage@bccancer.bc.ca](mailto:ksavage@bccancer.bc.ca)

**Received:** May 18, 2023.

**Accepted:** August 14, 2023.

<https://doi.org/10.3324/haematol.2021.280275>

©2023 Ferrata Storti Foundation

Published under a CC BY-NC license

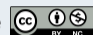

| Treatment                                                                            | Site             | PTCL type                                | Phase        | Study       | Status<br>Preliminary report |
|--------------------------------------------------------------------------------------|------------------|------------------------------------------|--------------|-------------|------------------------------|
| <b>Treatment naive</b>                                                               |                  |                                          |              |             |                              |
| CHO(E)P + duvelisib or azacitidine                                                   | U.S.<br>Alliance | PTCL-NOS, TFHL                           | 2            | NCT04803201 | Recruiting                   |
| Auto-SCT vs observation<br>TRANSCRIPT study                                          | Europe           | Nodal PTCLs<br>except ALK-<br>positive   | 3<br>CR only | NCT05444712 | Recruiting                   |
| Chidamide + CHOP untreated<br>TFHLs                                                  | China            | TFHL                                     | 2            | NCT05572983 | Recruiting                   |
| Chidamide + CHOP in<br>untreated AITL                                                | China            | AITL                                     | 2            | NCT03853044 | Active, not recruiting       |
| CHOP vs CHOP + targeted<br>combination <sup>a</sup>                                  | China            | All PTCLs                                | 2, parallel  | NC504480099 | Active, not recruiting       |
| CHOP + lenalidomide vs CHOP<br>in untreated PTCL                                     | China            | PTCL                                     | 2            | NCT04922567 | Recruiting                   |
| Azacitidine + chidamide CHOP<br>vs CHOP                                              | China            | TFHL                                     | 3            | NCT05678933 | Enrolling, by invitation     |
| CHP + brentuximab vodoiin                                                            | U.S.             | PTCL-NOS/TFHL<br>CD30 < 10% <sup>d</sup> | Phase2       | NCT04569032 | Recruiting                   |
| CHOP + golidocitinib                                                                 | China            | All PTCLs                                | Phase 2      | NCT05963347 | Not yet recruiting           |
| <b>Relapsed Refractory</b>                                                           |                  |                                          |              |             |                              |
| <b>Novel agents and combination therapies</b>                                        |                  |                                          |              |             |                              |
| Azacitidine vs investigator's<br>choice <sup>b</sup>                                 | Japan            | AITL                                     | 3            | NCT03703375 | Not recruiting               |
| Romidepsin + azacitidine vs<br>investigator's choice <sup>c</sup>                    | U.S.             | PTCL                                     | 2B (R)       | NCT04747236 | Recruiting                   |
| Pembrolizumab + pralatrexate                                                         | U.S.             | All PTCL                                 | 1/2          | NCT03598998 | Recruiting                   |
| Valemetostat (EZH1 dual<br>inhibitor)                                                | Global           | All PTCL                                 | 2            | NCT04703192 | Not recruiting               |
| Lacutamab (anti-KIR3DL2<br>antibody) + GemOx (LARO)                                  | U.S.             | KIR3DL2 + PTCL                           | 2            | NCT04984837 | Recruiting                   |
| Golidocitinib <sup>1</sup> (2 <sup>nd</sup> generation<br>JAK1 inhibitor) (JACKPOT8) | S. Korea         | All PTCL                                 | 1/2          | NCT04105010 | Recruiting                   |
| Tolinapant (dual IAP)                                                                | Global           | All PTCL                                 | 1/2          | NCT05403450 | Recruiting                   |

|                                                                                  |                                                          |                                           |     |             |                |
|----------------------------------------------------------------------------------|----------------------------------------------------------|-------------------------------------------|-----|-------------|----------------|
| antagonist) +<br>Decitabine/Cedazuridine                                         |                                                          |                                           |     |             |                |
| Nanatinostat + valganciclovir<br>(NAVAL-1)                                       | Global                                                   | EBV+ lymphomas                            | 2   | NCT0501058  | Recruiting     |
| <b>Cellular therapies</b>                                                        |                                                          |                                           |     |             |                |
| CD30 CART-cell<br>(UNC-Lineberger<br>Comprehensive Cancer Center)                | U.S.<br>UNC-Lineberger<br>Comprehensive<br>Cancer Center | CD30+ PTCL                                | 2   | NCT04083495 | Recruiting     |
| CD30 CAR-T-cell (RELY-30)<br>Baylor                                              | U.S.                                                     | CD30+ PTCL                                | 1   | NCT02917083 | Recruiting     |
| Autologous CART-cell CD30<br>with CCR4 (ATL.CD30.CCR4)<br>+/- ATL CAR.CD30 (UNC) | U.S.                                                     | CTCL Primary cut<br>CD30 LPD              | 1   | NCT03602157 | Recruiting     |
| AFM13<br>CD16/CD30 bispecific<br>antibody <sup>2</sup> (REDIRECT)                | Global                                                   | PTCL<br>tMF                               | 2   | NCT04101331 | Not recruiting |
| CTX130<br>CD70-directed allogeneic T cell<br>(COBALT-LIM)                        | Global                                                   | PTCL or BCL                               | 1   | NCT04502446 | Recruiting     |
| AUTO4 in TRBC1 positive T-cell<br>lymphoma <sup>3</sup>                          | U.K.                                                     | PTCL TRBC1 +<br>(PTCL-NOS, AITL,<br>ALCL) | 1/2 | NCT03590574 | Recruiting     |
| CART-cell in CD5 + T-cell<br>lymphomas (MAGENTA) <sup>4</sup>                    | U.S.<br>Baylor                                           | CD5+ TCL                                  | 1   | NCT03081910 | Recruiting     |

**Supplemental Table 1: Select ongoing clinical trials that include nodal PTCL**

<sup>a</sup>Excludes ALK+ALCL, extranodal NK/T-cell lymphoma, ATLL, T-LGL

<sup>b</sup>Investigator's choice romidepsin, gemcitabine: Note as of February 2023, study was active but not recruiting  
LARO Lymphoma Academic Research Organization R randomized

<sup>c</sup>Investigator's choice belinostat, pralatrexate, gemcitabine

<sup>d</sup>Also includes ATLL, EATL, HSTCL, MEITCL, indolent T-cell lymphoproliferative disorder of the GI tract

1. Kim W-S, Yoon D-H, Song Y, et al. S218: A Phase I/II Study of Golidocitinib, a Selective JAK1 Inhibitor, In Refractory Or Relapsed Peripheral T Cell Lymphoma. *Hemasphere* 2022;6:119–120.
2. Sawas A, Elgedawe H, Vlad G, et al. Clinical and Biological Evaluation of the Novel CD30/CD16A Tetravalent Bispecific Antibody (AFM13) in Relapsed or Refractory CD30-Positive Lymphoma with Cutaneous Presentation: A Biomarker Phase Ib/IIa Study (NCT03192202). *Blood* 2018;132(Supplement 1):2908–2908.
3. Cwynarski K, Iacoboni G, Tholouli E, et al. First in Human Study of AUTO4, a TRBC1-Targeting CAR T-Cell Therapy in Relapsed/Refractory TRBC1-Positive Peripheral T-Cell Lymphoma. *Blood* 2022;140(Supplement 1):10316–10317.
4. Hill L, Rouce RH, Smith TS, et al. CD5 CAR T-Cells for Treatment of Patients with Relapsed/Refractory CD5 Expressing T-Cell Lymphoma Demonstrates Safety and Anti-Tumor Activity. *Biology of Blood and Marrow Transplantation* 2020;26(3):S237.
